# Supplementary material
Source: PubMed Central journal article supplement (PMC2756430)
Supplement: NIHMS135119-supplement-Supp_data_5.pdf [file NIHMS135119-supplement-Supp_data_5.pdf]

Scortegagna, et al.

Supplementary Table 1.

| <b>Gene</b>     | <b>Forward Primer 5'-3'</b> | <b>Probe 5'-FAM 3'-BHQ-1</b> | <b>Reverse Primer</b>   |
|-----------------|-----------------------------|------------------------------|-------------------------|
| <b>Histone</b>  | CGTGAAATAGACGCTATCAGAA      | TCGCACCAGACGCTGAAAG          | TCCACTGAACTTCTGATCCGCAA |
| <b>NDRG1</b>    | TGAGGATGCCCGTCTCAA          | CCAACCTCGGGTGCCACCGGA        | TTGGGCCCGGCATTG         |
| <b>SELENBP1</b> | GCACGAAGTCACGCAACAAG        | CTGCCTGGTCTCATCTCCTCCCGC     | AGCCACATCCACCACGTA      |
| <b>Ki67</b>     | CGAAGCCGAGTCTGGCATT         | AACCCGCAGGGAGACTCGCAG TTT    | GGATCTGCGTCAGAGCCTTCT   |
| <b>CyclinD1</b> | TGTTACTTGTAGCGGCCTGTTG      | ACCATGCTGCTGGCCCGGAG         | CACCGGAGACTCAGAGCAAAT   |
