# Supplementary material
Source: PubMed Central journal article supplement (PMC2756430)
Supplement: NIHMS135119-supplement-Supp_data_6.pdf [file NIHMS135119-supplement-Supp_data_6.pdf]

**Supplementary Table 2, Scortegagna, et al.**

| <b>Gene</b>                           | <b>Unigene</b> | <b>NTG<br/>mean <math>\pm</math> SD</b> | <b>HIF-1<math>\alpha</math>DPM<br/>mean <math>\pm</math> SD</b> | <b>t-test</b> | <b>Fold change<br/>HIF-1<math>\alpha</math>DPM/NTG</b> |
|---------------------------------------|----------------|-----------------------------------------|-----------------------------------------------------------------|---------------|--------------------------------------------------------|
| selenium binding protein 2 (Selenbp2) | Mm.225405      | 74.8 $\pm$ 91                           | 8623.5 $\pm$ 5717                                               | 0.06          | 115                                                    |
| selenium binding protein 1 (Selenbp1) | Mm.196558      | 122.6 $\pm$ 117                         | 10854.4 $\pm$ 7152                                              | 0.06          | 88                                                     |
| N-myc downstream regulated 1 (NDRG1)  | Mm.30837       | 6511.9 $\pm$ 1654                       | 45695.1 $\pm$ 12213                                             | 0.005         | 7                                                      |
