# Supplementary material
Source: PubMed Central journal article supplement (PMC2756430)

Supplementary Figure 1, Scortegagna et. al.

**NTG**

**HIF-1 $\alpha$ DPM**

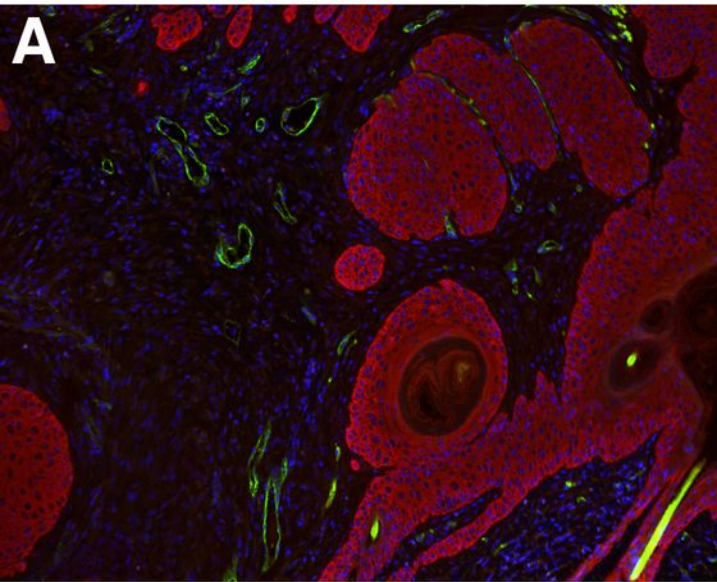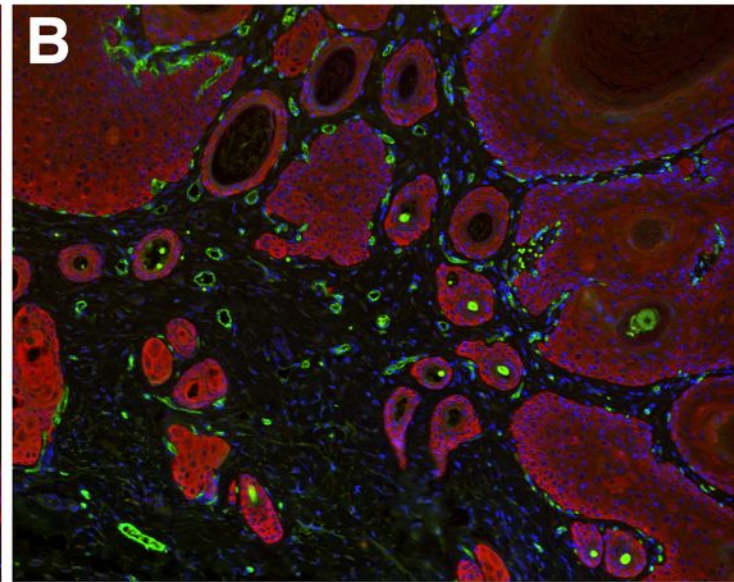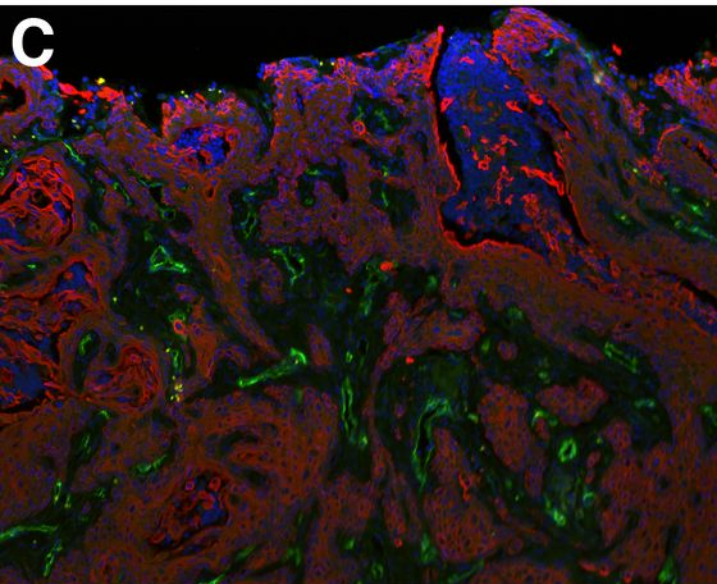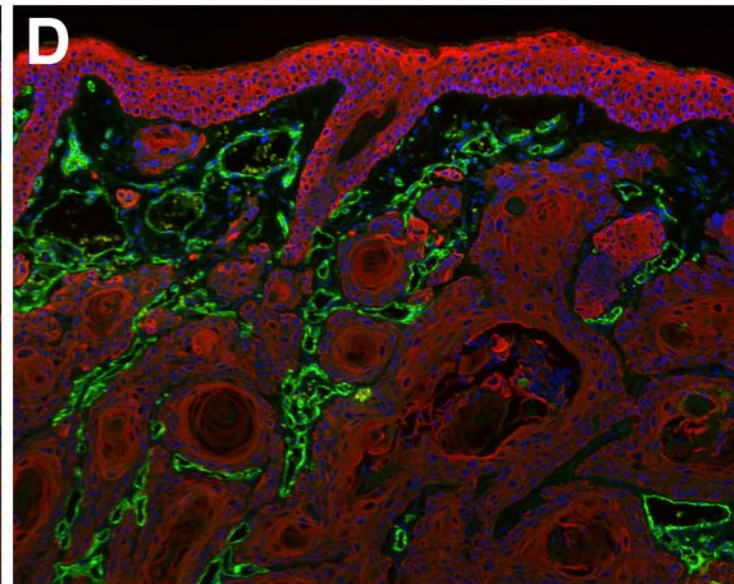

Supplement: NIHMS135119-supplement-Supp_data_1.pdf [file NIHMS135119-supplement-Supp_data_1.pdf]

**Supplementary Figure 2, Scortegagna, et al.**

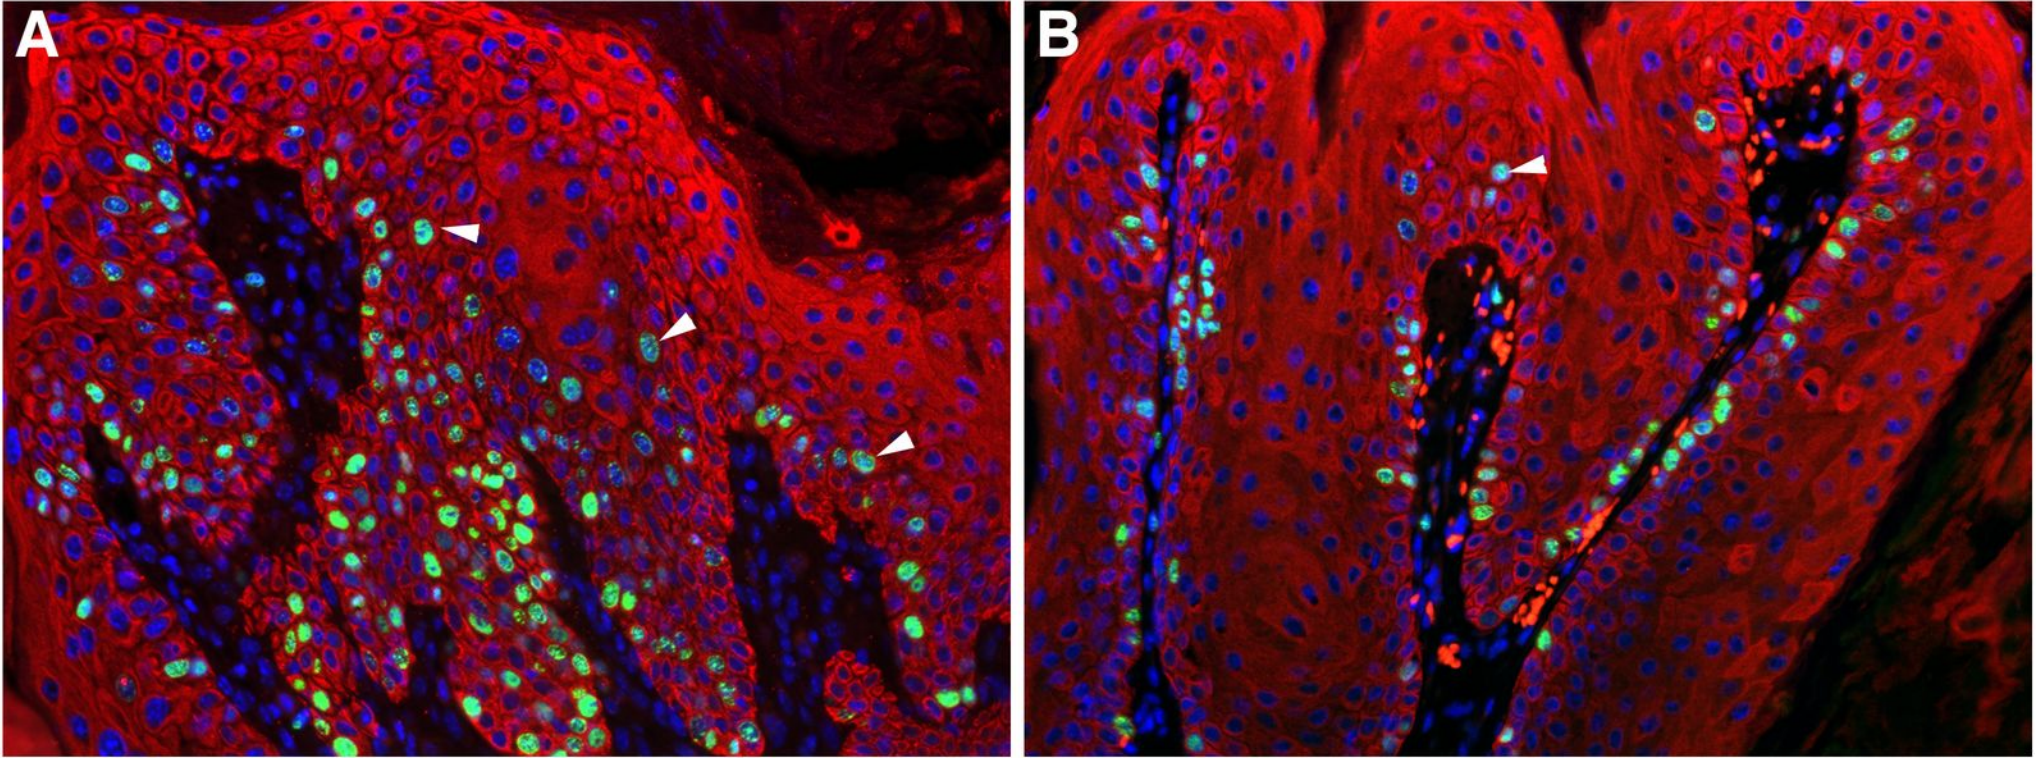

Supplement: NIHMS135119-supplement-Supp_data_2.pdf [file NIHMS135119-supplement-Supp_data_2.pdf]

Supplementary Figure 3, Scortegagna, et. al.

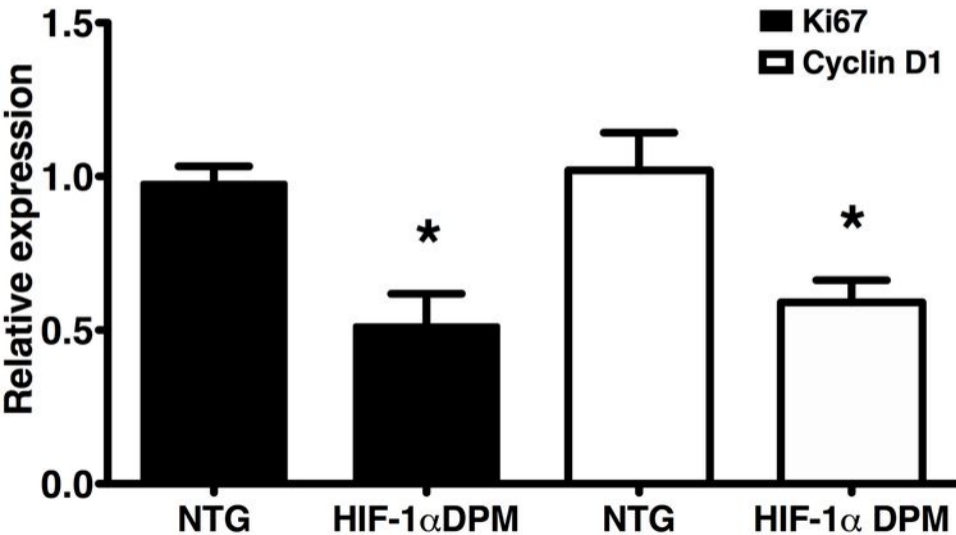

Supplement: NIHMS135119-supplement-Supp_data_3.pdf [file NIHMS135119-supplement-Supp_data_3.pdf]

# Supplementary Figure 4, Scortegagna, et al.

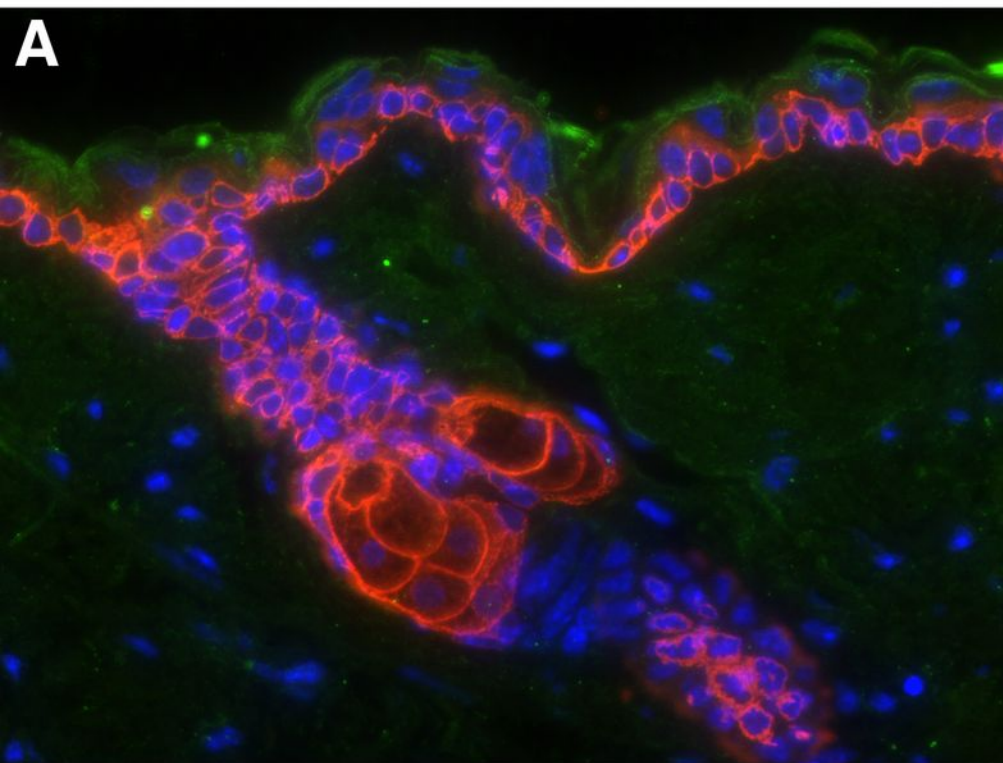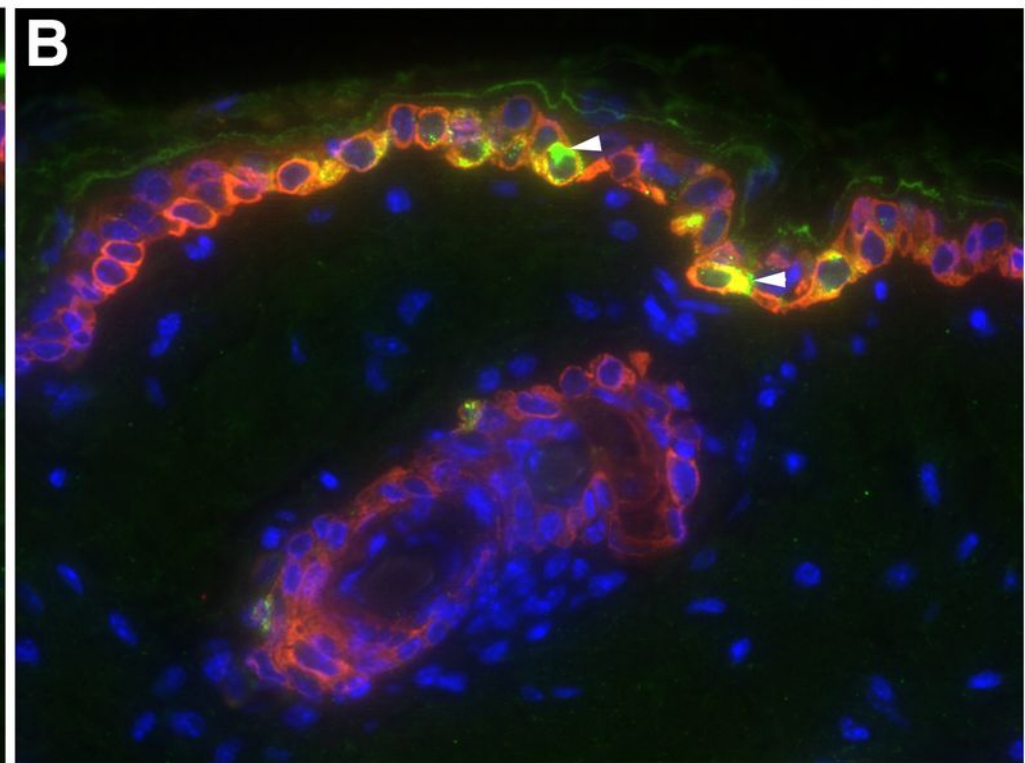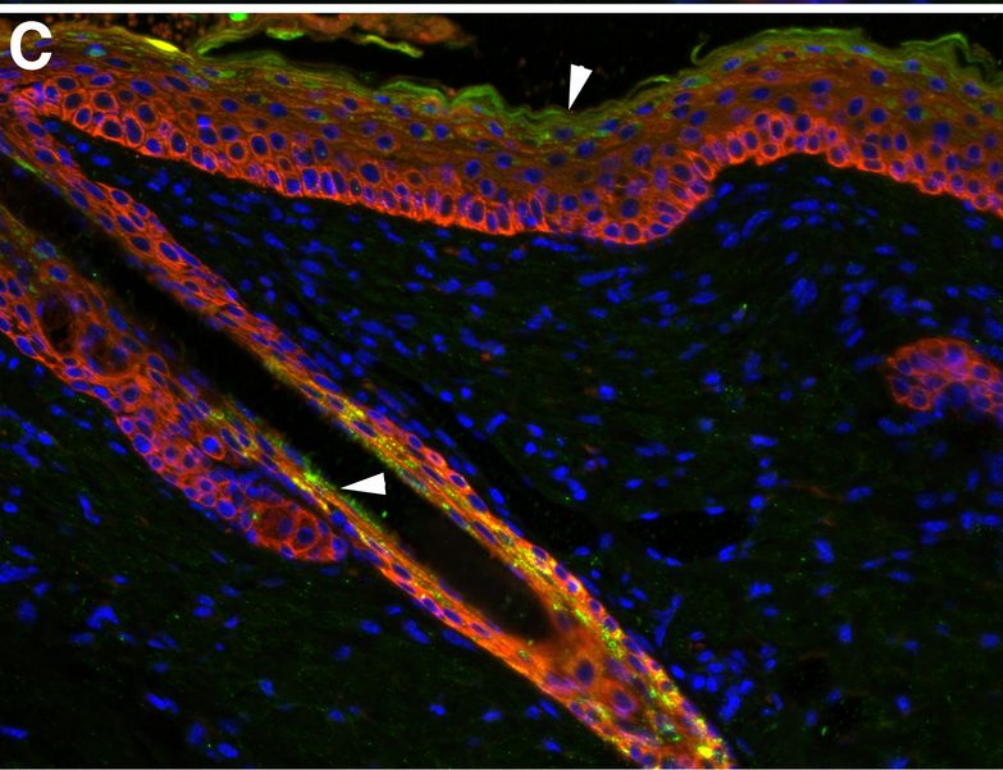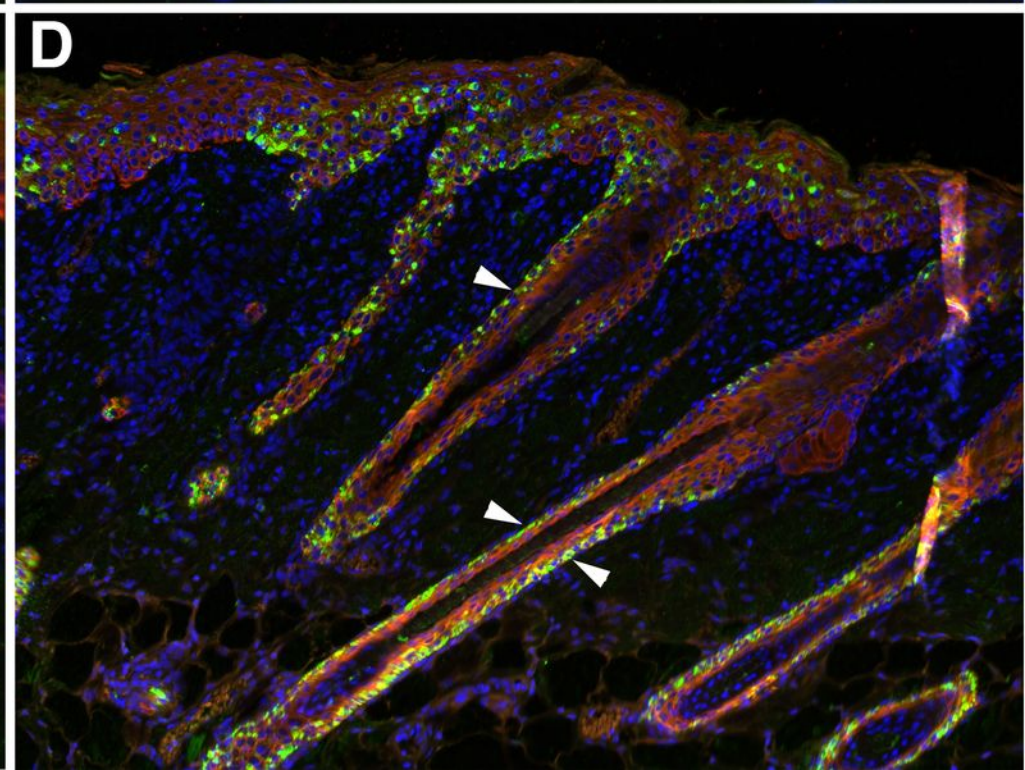

Supplement: NIHMS135119-supplement-Supp_data_4.pdf [file NIHMS135119-supplement-Supp_data_4.pdf]
